# Supplementary material
Source: PubMed Central journal article supplement (PMC9556460)
Supplement: ajtr0014-6256-f5.pdf [file ajtr0014-6256-f5.pdf]

## Drug-coated balloon usage in LADo or LCXo

**Table S1.** Multivariate analysis for TLR\*

| Factors                 | $\beta$ | SE    | Wald  | <i>P</i> | Hazard Ratio (95% CI) |
|-------------------------|---------|-------|-------|----------|-----------------------|
| Strategy                | 0.395   | 1.411 | 0.078 | 0.779    | 1.484 (0.093-23.578)  |
| Diabetes mellitus       | 0.033   | 0.883 | 0.001 | 0.970    | 1.034 (0.183-5.833)   |
| Hypertension            | -0.666  | 0.915 | 0.530 | 0.467    | 0.514 (0.086-3.087)   |
| Hyperlipidemia          | 0.542   | 0.909 | 0.355 | 0.551    | 1.719 (0.289-10.210)  |
| Acute coronary syndrome | 0.371   | 0.894 | 0.172 | 0.678    | 1.449 (0.251-8.354)   |
| Diffuse lesion          | 0.526   | 1.376 | 0.146 | 0.702    | 1.693 (0.114-25.086)  |

\*SE denotes standard error, CI confidence interval. Assignment: Strategy (DCB-only = 0, Hybrid = 1); other variables (Yes = 1, No = 0).
